# Supplementary material
Source: Springer Nature journal article supplement (https://www.springermedizin.de/resource/supplementary/12936_2014_3657_MOESM3_ESM.pdf/9546120)
Supplement: MOESM3 [file 9546120]

**ADDITIONAL FILE 3**

**SYSTEMATIC REVIEW OF COST-EFFECTIVENESS ANALYSES OF INSECTICE-TREATED BEDNETS AND INDOOR RESIDUAL SPRAYING FOR MALARIA CONTROL IN AFRICA**

In order to contextualize the results of this economic evaluation of larviciding for malaria control, cost-effectiveness analyses of indoor residual spraying (IRS) and insecticide-treated bendets (ITN) for malaria control in SSA were systematically reviewed. This review will help examine the methodological issues and assumptions upon which these economic evaluations are based.

**Methodology**

PubMed was queried using the terms described below (Table 1). No time restriction was imposed. The search retrieved 402 publications that were evaluated based on either title alone (n=253) or title and abstract (n=149). The eligibility and exclusion criteria are described in Table 2. A total of 12 articles for IRS and 24 for ITN were selected based on their title and abstract but 5 IRS and 6 ITN studies were excluded after reading the paper (Table 3). Finally, one IRS study was identified through other means and included in the review. Hence, a total of 7 IRS and 18 ITN cost-effectiveness studies were included in the final review.

**Results**

A summary of the reviewed cost-effectiveness studies of IRS is present in Table 4. Cost-effectiveness studies of ITN is presented in Table 5.

**Table 1** PubMed search query information for the systematic review

|                                                                                                                                                                                                                                                                                             |
|---------------------------------------------------------------------------------------------------------------------------------------------------------------------------------------------------------------------------------------------------------------------------------------------|
| <p><b>PubMed Search:</b><br/>         (malaria OR falciparum) AND (cost OR cost-effectiveness) AND ((ITN OR bed net* OR bednet* OR net OR long-lasting insecticide-treated net* OR LLIN) OR ((insecticide OR residual house spraying OR indoor residual spraying OR IRS))) AND (Africa)</p> |
|---------------------------------------------------------------------------------------------------------------------------------------------------------------------------------------------------------------------------------------------------------------------------------------------|

**Table 2** Eligibility and exclusion criteria for the systematic review

|                             |                                                                                                                                                                                                                                                                                                                                                                                   |
|-----------------------------|-----------------------------------------------------------------------------------------------------------------------------------------------------------------------------------------------------------------------------------------------------------------------------------------------------------------------------------------------------------------------------------|
| <b>Eligibility Criteria</b> | <ul style="list-style-type: none"> <li>-Study conducted in Africa.</li> <li>-Study reports cost-effectiveness of IRS or ITN.</li> <li>-Malaria cases, malaria deaths, or DALYs are the health outcomes.</li> </ul>                                                                                                                                                                |
| <b>Exclusion Criteria</b>   | <ul style="list-style-type: none"> <li>-Study not relevant to malaria.</li> <li>-Literature review.</li> <li>-Letter to the Editor.</li> <li>-Studies conducted on packages of interventions where we cannot distinguish between IRS, ITN, or any combinations of interventions.</li> <li>-Study is published in a language other than English, French, or Portuguese.</li> </ul> |

**Table 3** Studies retrieved, selected, and included in the systematic review

|                                                 |                      |
|-------------------------------------------------|----------------------|
| Articles Retrieved (IRS and ITN combined)       | 402                  |
| Articles selected based on title and abstract   | IRS = 12<br>ITN = 24 |
| Final number of articles included in the review | IRS = 7<br>ITN = 18  |

**Table 4** Summary of cost-effectiveness analyses of indoor residual spraying interventions conducted in sub-Saharan Africa.

| Country                         | Year of Program               | Currency  | Age Group                                  | Perspective          | Cost PPY                                                 | Effect Size                                                                  | Incidence per 1,000                                                                  | CER / Infection | CER / Death                  | CER / DALY                                                                                                                                                         | Ref |
|---------------------------------|-------------------------------|-----------|--------------------------------------------|----------------------|----------------------------------------------------------|------------------------------------------------------------------------------|--------------------------------------------------------------------------------------|-----------------|------------------------------|--------------------------------------------------------------------------------------------------------------------------------------------------------------------|-----|
| Low and Middle Income Countries | NA                            | USD 2001  | NA                                         | Provider             | NA                                                       | 50% reduction in incidence; 17% reduction in child mortality                 | NA                                                                                   | NA              | NA                           | Once a year: Malathion =\$12; DDT =\$9; Deltamethrin =\$10; λ-cyhalothrin =\$10; Twice a year: Malathion =\$24; DDT =\$17; Deltamethrin =\$18; λ-cyhalothrin =\$19 | [1] |
| South Africa and Mozambique     | SA =1997-1999; MZ =1999-2001  | USD 2005  | <5                                         | Provider             | SA =\$3.27 and MZ =\$3.90                                | 5.5 child deaths averted per 1,000 child-years                               | NA                                                                                   | NA              | SA =\$4,357; MZ =\$3,933     | SA =\$132; MZ =\$119                                                                                                                                               | [2] |
| SSA                             | Hypothetical 10 years program | Int 2000  | <5                                         | Provider             | NA                                                       | 50% reduction in incidence; 20% reduction in case fatality                   | <u>Incidence:</u> Afr-D= 1,436; Afr-E= 1,184. <u>Mortality:</u> Afr-D= 7; Afr-E = 8. | NA              | NA                           | Afr-D =\$32; Afr-E =\$41                                                                                                                                           | [3] |
| Kenya                           | 1999-2000                     | ~USD 2000 | 0-99                                       | Provider             | \$0.88                                                   | RR=0.25 (0.24-0.27)                                                          | NA                                                                                   | \$9             | NA                           | NA                                                                                                                                                                 | [4] |
| SSA (model)                     | NA                            | USD 1995  | <1                                         | Provider & Community | Once yearly (\$5.76-10.18); Twice yearly (\$11.53-20.36) | 52% decrease in all cause mortality                                          | 1,500                                                                                | NA              | NA                           | Once yearly (\$16-29); Twice yearly (\$32-58)                                                                                                                      | [5] |
| Mozambique                      | 0                             | USD 2000  | 2-15 (parasitaemia) & 0-99 (clinical case) | Provider             | \$4.82                                                   | 11,857 malaria cases averted                                                 | NA                                                                                   | \$29.43         | 0                            | NA                                                                                                                                                                 | [6] |
| Model Area in Africa            | 1978                          | ~USD 1975 | 0-99                                       | Gross CER            | \$2                                                      | 40% reduction in crude death rate (adult); 50% reduction in infant mortality | NA                                                                                   | NA              | \$250 (all); \$600 (infants) | NA                                                                                                                                                                 | [7] |

**Table 5** Summary of cost-effectiveness analyses for insecticide-treated bednet interventions conducted in sub-Saharan Africa.

| Country                                                                        | Year of Program                                                             | Currency  | Age Group | Perspective          | Cost PPY                                                                           | Effect Size                                                                       | Incidence per 1,000                                                              | CER / Infection | CER / Death                                                                                    | CER / DALY                                                                          | Ref |
|--------------------------------------------------------------------------------|-----------------------------------------------------------------------------|-----------|-----------|----------------------|------------------------------------------------------------------------------------|-----------------------------------------------------------------------------------|----------------------------------------------------------------------------------|-----------------|------------------------------------------------------------------------------------------------|-------------------------------------------------------------------------------------|-----|
| Low and Middle Income Countries                                                | Hypothetical Program                                                        | USD 2001  | <5        | Provider             | NA                                                                                 | 5.5 child deaths averted per 1,000 child-years                                    | NA                                                                               | NA              | NA                                                                                             | Permethrin = \$17<br>Deltamethrin = \$11                                            | [1] |
| Eritrea (ER);<br>Togo (TG);<br>Malawi (MW);<br>Senegal (SG);<br>Tanzania (TZ); | ER=2001-2005;<br>TG=2004;<br>MW=1999-2005;<br>SG=2000-2005;<br>TZ=2002-2005 | USD 2005  | <5        | Provider             | Cost per ITN:<br>ER=\$3.98;<br>TG=\$3.32;<br>MW=\$3.36;<br>SG=\$8.05;<br>TZ=\$4.80 | 50% reduction in incidence;<br>20% reduction in case fatality                     | NA                                                                               | NA              | Including re-treatment:<br>ER=\$438;<br>TG=\$1,174;<br>MW=\$1,105;<br>SG=\$2,199;<br>TZ=\$788. | Including re-treatment:<br>ER=\$13;<br>TG=\$36;<br>MW=\$33;<br>SG=\$67;<br>TZ=\$24. | [2] |
| SSA                                                                            | Hypothetical 10 years program                                               | INT 2000  | <5        | Provider             | NA                                                                                 | RR=0.25 (0.24-0.27)                                                               | Incidence:<br>Afr-D=1,436;<br>Afr-E=1,184.<br>Mortality:<br>Afr-D=7;<br>Afr-E=8. | NA              | NA                                                                                             | Afr-D = \$29<br>Afr-E = \$41                                                        | [3] |
| Kenya                                                                          | 1999-2000                                                                   | ~USD 2000 | 0-99      | Provider             | \$2.02-2.34                                                                        | 19% decrease in all cause mortality;<br>46% decrease in malaria-related morbidity | NA                                                                               | \$29            | NA                                                                                             | NA                                                                                  | [4] |
| SSA (model)                                                                    | NA                                                                          | USD 1995  | <5        | Provider & Community | Not mentioned                                                                      | 0.69 (ITN vs IRS)                                                                 | 1500                                                                             | NA              | NA                                                                                             | Bednet only: \$19-85;<br>Bednet and insecticide: \$25-96                            | [5] |

| Country                          | Year of Program                                                           | Currency | Age Group      | Perspective          | Cost PPY                      | Effect Size                                                            | Incidence per 1,000                                | CER / Infection | CER / Death | CER / DALY        | Ref  |
|----------------------------------|---------------------------------------------------------------------------|----------|----------------|----------------------|-------------------------------|------------------------------------------------------------------------|----------------------------------------------------|-----------------|-------------|-------------------|------|
| South Africa (KwaZulu-Natal)     | 1998-1999 (Comparison ITN vs IRS)                                         | USD 1999 | All            | Provider             | 7.62                          | HR for infant mortality of 0.78                                        | 253 (174.5 /0.69)                                  | 16              | \$1,696     | NA                | [8]  |
| Democratic Republic of the Congo | 2005-2006 (Comparison ITN vs diagnosis / treatment, IPTp, / ANC services) | USD 2005 | Pregnant women | Provider             | Not mentioned                 | Reduction in all-cause mortality of 17% among U5                       | Used an infant mortality rate of 95/1,000          | NA              | \$411.13    | \$17.22           | [9]  |
| Togo                             | 2004-2005                                                                 | USD 2004 | <5             | Provider             | \$5.95 (per LLIN distributed) | Reduction in incidence of 50% and 5.5 deaths averted per 1,000         | 1,209                                              | 4.4             | \$856       | \$22.1            | [10] |
| United Republic of Tanzania      | 2004-2006                                                                 | USD 2006 | <5             | Provider             | \$7.57 (per ITN delivered)    | PE=27%                                                                 | Incidence of malaria outpatient in U5 is 723/1,000 | NA              | \$873       | NA                | [11] |
| United Republic of Tanzania      | 1996-2000                                                                 | USD 2000 | <5             | Provider             | \$13.38 per treated-net year  | NA (73 deaths averted)                                                 | Infant mortality =73; Child mortality =15          | NA              | \$1,559     | \$57              | [12] |
| Kenya                            | 1997-1999                                                                 | USD 1996 | <5             | Provider & Community | \$1.40 (\$1.90 per ITN)       | Reduction in incidence of 46%; reduction in all cause mortality of 19% | NA                                                 | NA              | \$1,214     | \$49              | [13] |
| Sub-Saharan Population           | Not mentioned                                                             | USD 1995 | 1-119 months   | Provider             | 3.79                          | Not mentioned                                                          | U5 =1,500; 5-10 =555                               | NA              | NA          | No rebound = \$44 | [14] |

| Country     | Year of Program      | Currency  | Age Group                                                    | Perspective          | Cost PPY                                | Effect Size                                                                       | Incidence per 1,000                                 | CER / Infection | CER / Death | CER / DALY                                          | Ref  |
|-------------|----------------------|-----------|--------------------------------------------------------------|----------------------|-----------------------------------------|-----------------------------------------------------------------------------------|-----------------------------------------------------|-----------------|-------------|-----------------------------------------------------|------|
| Guinea      | Not mentioned        | USD 1994  | <5                                                           | Provider             | 3                                       | 50% reduction in incidence; 35% reduction in all-cause mortality                  | Mortality =14                                       | NA              | NA          | \$43                                                | [15] |
| The Gambia  | 1990-1995            | USD 1990  | The cohort of children born in 1990 and followed for 5 years | Provider             | NA                                      | Estimated from 10 villages                                                        | 1-6 months =200; 6-12 months =800; 1-5 years =1,000 | NA              | \$711       | NA                                                  | [16] |
| The Gambia  | 1991-1992            | USD 1992  | <10                                                          | Provider & Community | NA                                      | U5 mortality reduced by 17%                                                       | 440                                                 | NA              | \$471       | \$31.5                                              | [17] |
| Ghana       | 1993-1994            | USD 1994  | <5                                                           | Provider & Community | \$1.2 per child-year (\$2.4 per bednet) | All-cause mortality reduced by 25% in U5.                                         | NA                                                  | NA              | \$2,003     | \$73.5                                              | [18] |
| West Africa | 5 years of follow-up | ~USD 1996 | Cohort of new-born                                           | Provider             | Not mentioned                           | 60% decrease in mortality in the 1-4 years old; 45% decrease in clinical episodes | Not mentioned                                       | NA              | NA          | 100% compliance = \$18.88; 50% compliance = \$38.04 | [19] |
| The Gambia  | 1989-1990            | USD 1990  | 1-4 years of age                                             | Provider & Community | \$5.65 per child-year                   | 0                                                                                 | Not mentioned                                       | NA              | \$187.53    | \$7.9                                               | [20] |

ANC = antenatal care; INT = international dollar; IPTp = intermittent treatment for malaria in pregnancy; ITN = insecticide treated nets; IRS = indoor residual spraying; LLIN = long-lasting insecticide-treated nets; NA = not applicable; U5 = under five years of age; USD = United States dollar.

## REFERENCES:

1. Breman J, Mills A, Snow R, Jo-Ann Mulligan J, Lengeler C, Mendis K, Marchesini P, White N, Steketee R, Doumbo O: **Conquering Malaria**. In *Disease Control Priorities in Developing Countries*. 2<sup>nd</sup> Edition edition. Edited by Jamison DT, Breman JG, Measham AR, Alleyne G, Claeson M, Evans DB, Jha P, Mills A, Musgrove P. Washington, DC: World Bank; 2006
2. Yukich JO, Lengeler C, Tediosi F, Brown N, Mulligan JA, Chavasse D, Stevens W, Justino J, Conteh L, Maharaj R, et al: **Costs and consequences of large-scale vector control for malaria**. *Malar J* 2008, **7**:258.
3. Morel CM, Lauer JA, Evans DB: **Cost effectiveness analysis of strategies to combat malaria in developing countries**. *BMJ* 2005, **331**:1299.
4. Guyatt HL, Corlett SK, Robinson TP, Ochola SA, Snow RW: **Malaria prevention in highland Kenya: indoor residual house-spraying vs. insecticide-treated bednets**. *Trop Med Int Health* 2002, **7**:298-303.
5. Goodman CA, Coleman PG, Mills AJ: **Cost-effectiveness of malaria control in sub-Saharan Africa**. *Lancet* 1999, **354**:378-385.
6. Conteh L, Sicuri E, Manzi F, Hutton G, Obonyo B, Tediosi F, Biao P, Masika P, Matovu F, Otieno P, et al: **The cost-effectiveness of intermittent preventive treatment for malaria in infants in Sub-Saharan Africa**. *PLoS One* 2010, **5**:e10313.
7. Walsh JA, Warren KS: **Selective primary health care: an interim strategy for disease control in developing countries**. *N Engl J Med* 1979, **301**:967-974.
8. Goodman CA, Mnzava AE, Dlamini SS, Sharp BL, Mthembu DJ, Gumede JK: **Comparison of the cost and cost-effectiveness of insecticide-treated bednets and residual house-spraying in KwaZulu-Natal, South Africa**. *Trop Med Int Health* 2001, **6**:280-295.
9. Becker-Dreps SI, Biddle AK, Pettifor A, Musuamba G, Imbie DN, Meshnick S, Behets F: **Cost-effectiveness of adding bed net distribution for malaria prevention to antenatal services in Kinshasa, Democratic Republic of the Congo**. *Am J Trop Med Hyg* 2009, **81**:496-502.
10. Mueller DH, Wiseman V, Bakusa D, Morgah K, Daré A, Tchamdja P: **Cost-effectiveness analysis of insecticide-treated net distribution as part of the Togo Integrated Child Health Campaign**. *Malar J* 2008, **7**:73.
11. Mulligan JA, Yukich J, Hanson K: **Costs and effects of the Tanzanian national voucher scheme for insecticide-treated nets**. *Malar J* 2008, **7**:32.
12. Hanson K, Kikumbih N, Armstrong Schellenberg J, Mponda H, Nathan R, Lake S, Mills A, Tanner M, Lengeler C: **Cost-effectiveness of social marketing of insecticide-treated nets for malaria control in the United Republic of Tanzania**. *Bull World Health Organ* 2003, **81**:269-276.

13. Wiseman V, Hawley WA, ter Kuile FO, Phillips-Howard PA, Vulule JM, Nahlen BL, Mills AJ: **The cost-effectiveness of permethrin-treated bed nets in an area of intense malaria transmission in western Kenya.** *Am J Trop Med Hyg* 2003, **68**:161-167.
14. Coleman PG, Goodman CA, Mills A: **Rebound mortality and the cost-effectiveness of malaria control: potential impact of increased mortality in late childhood following the introduction of insecticide treated nets.** *Trop Med Int Health* 1999, **4**:175-186.
15. Jha P, Bangoura O, Ranson K: **The cost-effectiveness of forty health interventions in Guinea.** *Health Policy Plan* 1998, **13**:249-262.
16. Graves PM: **Comparison of the cost-effectiveness of vaccines and insecticide impregnation of mosquito nets for the prevention of malaria.** *Ann Trop Med Parasitol* 1998, **92**:399-410.
17. Aikins MK, Fox-Rushby J, D'Alessandro U, Langerock P, Cham K, New L, Bennett S, Greenwood B, Mills A: **The Gambian National Impregnated Bednet Programme: costs, consequences and net cost-effectiveness.** *Soc Sci Med* 1998, **46**:181-191.
18. Binka FN, Mensah OA, Mills A: **The cost-effectiveness of permethrin impregnated bednets in preventing child mortality in Kassena-Nankana district of Northern Ghana.** *Health Policy* 1997, **41**:229-239.
19. Evans DB, Azene G, Kirigia J: **Should governments subsidize the use of insecticide-impregnated mosquito nets in Africa? Implications of a cost-effectiveness analysis.** *Health Policy Plan* 1997, **12**:107-114.
20. Picard J, Aikins M, Alonso PL, Armstrong Schellenberg JR, Greenwood BM, Mills A: **A malaria control trial using insecticide-treated bed nets and targeted chemoprophylaxis in a rural area of The Gambia, west Africa. 8. Cost-effectiveness of bed net impregnation alone or combined with chemoprophylaxis in preventing mortality and morbidity from malaria in Gambian children.** *Trans R Soc Trop Med Hyg* 1993, **87 Suppl 2**:53-57.
